# Supplementary material for: Transition metal Si-chalcogenides: a new two-dimensional anode material for Na-ion batteries
Source: Royal Society of Chemistry journal article supplement (doi:10.1039/d4cp01843e), 2024-01-01
Supplement: d4cp01843e1.pdf [file d4cp01843e1.pdf]

## Supporting Information

### Transition Metal Si-Chalcogenides: A New Two-Dimensional Anode Material for Na-Ion Batteries

K. H. Yeoh<sup>1, a</sup>, Y. H. R. Chang<sup>2, a</sup>, K.-H. Chew<sup>3, 4</sup>, D. S. Ong<sup>5</sup>, C. F. Dee<sup>6, 7</sup>, B. T. Goh<sup>8</sup>, E. Y. Chang<sup>7, 9, 10</sup> and H. W. Yu<sup>7, 9</sup>

<sup>1</sup> Jeffrey Sachs Center on Sustainable Development, Sunway University, No. 5, Jalan Universiti, Bandar Sunway, 47500, Selangor, Malaysia.

<sup>2</sup>Faculty of Applied Sciences, Universiti Teknologi MARA, Cawangan Sarawak, 94300 Kota Samarahan, Sarawak.

<sup>3</sup>Zhejiang Expo New Materials Co. Ltd., 1066, Xincheng Times Avenue, Longgang, Wenzhou 325802, China

<sup>4</sup>Key Laboratory of Optical Field Manipulation of Zhejiang Province, Department of Physics, Zhejiang Sci-Tech University, Hangzhou 310018, China. ; Longgang Institute of Zhejiang Sci-Tech University, Wenzhou 325802, China.

<sup>5</sup>Faculty of Engineering, Multimedia University, Persiaran Multimedia, 63100 Cyberjaya, Selangor, Malaysia.

<sup>6</sup>Institute of Microengineering and Nanoelectronics (IMEN), Universiti Kebangsaan Malaysia (UKM), Bangi, Selangor 43600, Malaysia.

<sup>7</sup>International College of Semiconductor Technology, National Yang Ming Chiao Tung University, Hsinchu 30010, Taiwan.

<sup>8</sup>Low Dimensional Materials Research Centre (LDMRC), Department of Physics, Faculty of Science, University of Malaya, 50603 Kuala Lumpur, Malaysia.

<sup>9</sup>Department of Materials Science and Engineering, National Yang Ming Chiao Tung University, Hsinchu 30010, Taiwan.

<sup>10</sup>Institute of Electronics Engineering, National Yang Ming Chiao Tung University, Hsinchu 30010, Taiwan

<sup>a</sup>Author to whom correspondence should be addressed. Electronic mail:

keathoe@sunway.edu.my, robincyh@uitm.edu.my

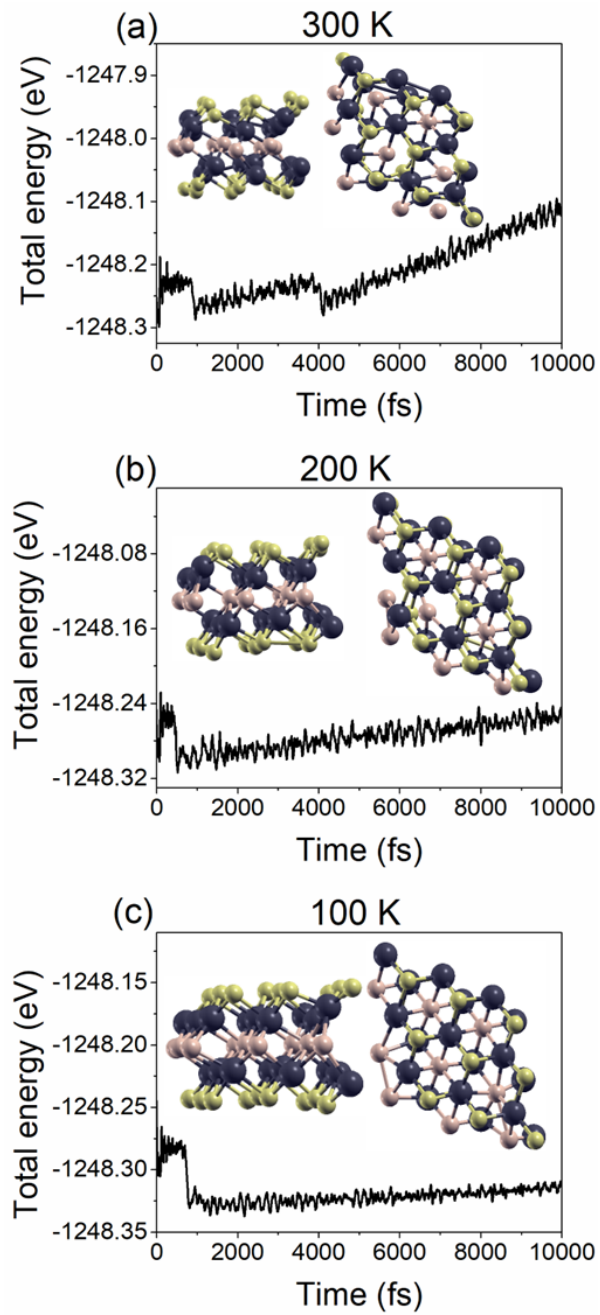

**Fig. S1** Fluctuation of energy under AIMD simulations at (a) 300 K (b) 200 K and (c) 100 K for 2D Nb<sub>2</sub>S<sub>2</sub>Si. The yellow, black and light pink balls denote S, Nb and Si atoms, respectively.

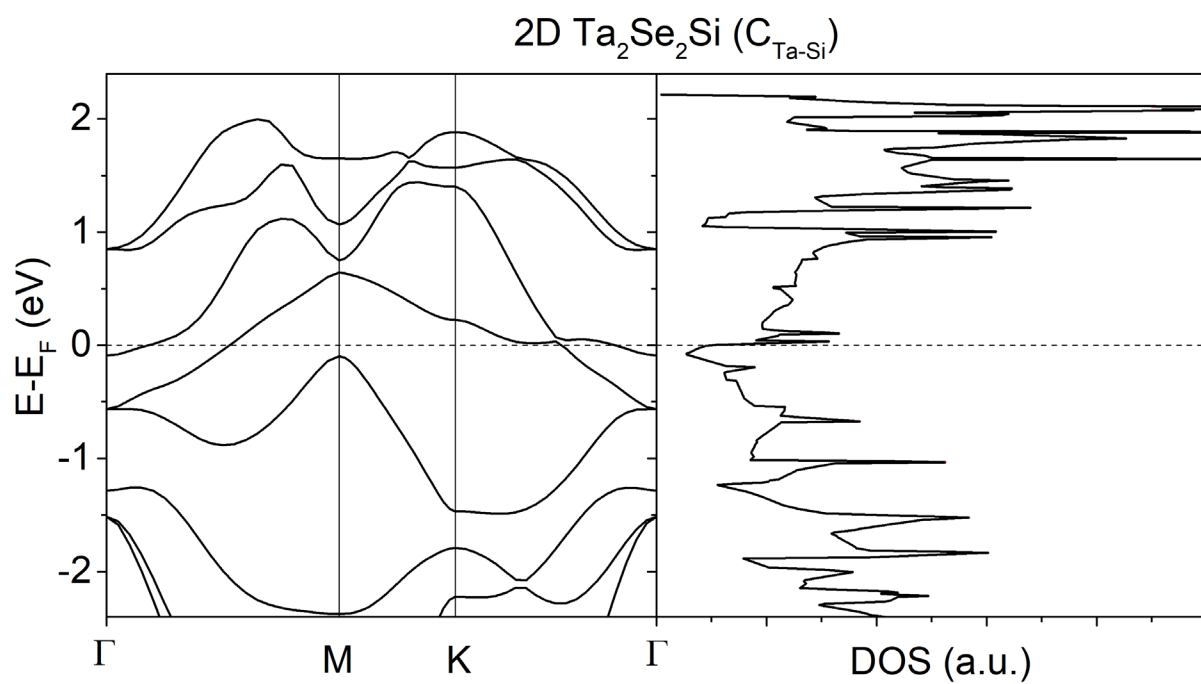

**Fig. S2** Band structure and DOS of the 2D  $\text{Ta}_2\text{Se}_2\text{Si}$  ( $C_{\text{Ta-Si}}$ ).
